# Supplementary material
Source: Elsevier journal article supplement (https://www.sciencedirect.com/science/article/pii/S2529984020300173)
Supplement: mmc1 [file S2529984020300173:mmc1.docx]

**Anexo 1**

**CUESTIONARIO AL PERSONAL SANITARIO SOBRE LA VISITA DE MENORES DE EDAD EN LA UNIDAD DE CUIDADOS INTENSIVOS**

**Marque con una X el recuadro que corresponda**.

Categoría profesional □ Enfermera □ Auxiliar □ Médico

Edad………………años Sexo □ Hombre □Mujer

Años de experiencia profesional……………………años

¿Tiene usted hijos? □Sí □ No

**Marque con una X el recuadro que corresponda**.

1. Pienso que los menores de edad de 0-6 años podrían visitar a su familiar o allegado ingresado en la UCI

□Sí □ No □ No lo sé

2. Pienso que los menores de edad de 7-12 años podrían visitar a su familiar o allegado ingresado en la UCI

□Sí □ No □ No lo sé

3. Pienso que los menores de edad de 13-17 años podrían visitar a su familiar o allegado ingresado en la UCI

□Sí □ No □ No lo sé

4. Pienso que los menores de edad podrían visitar a su familiar o allegado independientemente del estado y aspecto del paciente

□Sí □ No □ No lo sé

Explíquelo con sus propias palabras

……………………………………………………………………………………………………………………………………………………………………………………………………………………………………………………………………………………………………………………………………………………………………………………………………………………………………………………………………………………………………………………………………………………………………………………………………………………………………………………………………………………………………………………………………………………..

5. ¿Cuáles son las razones para restringir las visitas de menores de edad (0-17 años) a su familiar o allegado ingresado en la UCI?

Explíquelo con sus propias palabras

………………………………………………………………………………………………………………………………………………………………………………………………………………………………………………………………………………………………………………………………………………………………………………………………………………………………………………………………………………………………………………………………………………………………………………………………………………………………………………………………………………………………………………..

6. ¿Cuáles son las razones para permitir las visitas de menores de edad (0-17 años) a su familiar o allegado ingresado en la UCI?

Explíquelo con sus propias palabras

………………………………………………………………………………………………………………………………………………………………………………………………………………………………………………………………………………………………………………………………………………………………………………………………………………………………………………………………………………………………………………………………………………………………………………………………………………………………………………………………………………………………………………...

7. Permitiría a los menores de edad (0-17 años) las visitas si el paciente fuera su:

|  | 0-6 años | 7-12 años | 13-17 años |
| --- | --- | --- | --- |
| Madre/Padre | □Sí □ No | □Sí □ No | □Sí □ No |
| Hermano/a | □Sí □ No | □Sí □ No | □Sí □ No |
| Abuelo/a | □Sí □ No | □Sí □ No | □Sí □ No |
| Amigo/Compañero | □Sí □ No | □Sí □ No | □Sí □ No |
| Primo/otro familiar | □Sí □ No | □Sí □ No | □Sí □ No |
| Relación próxima  (ejemplo: canguro) | □Sí □ No | □Sí □ No | □Sí □ No |

Permitiría a los menores de edad (0-17 años) las visitas si el paciente estuviera:

|  | 0-6 años | 7-12 años | 13-17 años |
| --- | --- | --- | --- |
| Estable | □Sí □ No | □Sí □ No | □Sí □ No |
| Muriendo | □Sí □ No | □Sí □ No | □Sí □ No |
| Inconsciente | □Sí □ No | □Sí □ No | □Sí □ No |
| Despierto y alerta | □Sí □ No | □Sí □ No | □Sí □ No |
| Cansado | □Sí □ No | □Sí □ No | □Sí □ No |
| Estado crítico | □Sí □ No | □Sí □ No | □Sí □ No |
| Conectado a máquinas/tubos | □Sí □ No | □Sí □ No | □Sí □ No |

8. ¿Piensa que el entorno de la UCI asusta a los menores de edad?

□Sí □ No □ No lo sé

Explíquelo con sus propias palabras

……………………………………………………………………………………………………………………………………………………………………………………………………………………………………………………………………………………………………………………………………………………………………………………………………………………………………………………………………………………………………………………………………………………………………………………………………………………………………………………………………………………………………………………………………………………..

9. ¿Piensa que la apariencia de los pacientes asusta a los menores de edad?

□Sí □ No □ No lo sé

Explíquelo con sus propias palabras

……………………………………………………………………………………………………………………………………………………………………………………………………………………………………………………………………………………………………………………………………………………………………………………………………………………………………………………………………………………………………………………………………………………………………………………………………………………………………………………………………………………………………………………………………………………...

10. Ha prohibido una visita debido al riesgo de infección del:

Paciente ingresado: □Sí □ No □ No lo sé

Menor de edad: □Sí □ No □ No lo sé

Explíquelo con sus propias palabras

……………………………………………………………………………………………………………………………………………………………………………………………………………………………………………………………………………………………………………………………………………………………………………………………………………………………………………………………………………………………………………………………………………………………………………………………………………………………………………………………………………………………………………………………………………………...

11. Ha prohibido una visita a causa de lo ruidosos y movidos que son los niños en beneficio del:

Paciente ingresado: □Sí □ No □ No lo sé

Personal sanitario y su trabajo: □Sí □ No □ No lo sé

Explíquelo con sus propias palabras

………………………………………………………………………………………………………………………………………………………………………………………………………………………………………………………………………………………………………………………………………………………………………………………………………………………………………………………………………………………………………………………………………………………………………………………………………………………………………………………………………………………………………………………………………………………

12. Piensa que los menores corren riesgo de sufrir un trauma psicológico si:

Se les permiten las visitas □Sí □ No □ No lo sé

No se les permiten las visitas □Sí □ No □ No lo sé

Explíquelo con sus propias palabras

…………………………………………………………………………………………………………………………………………………………………………………………………………………………………………………………………………………………………………………………………………………………………………………………………………………………………........................................................................................................................................................................................................................................................................................

Gracias por su colaboración
